# Supplementary material for: Reducing pesticide use in fruit and vegetables: Are economic, environmental, and health dimensions always aligned?
Source: Research Square preprint supplement (doi:10.21203/rs.3.rs-8016687/v1), 2025-12-08
Supplement: Supplementary file 1 [file 68410f4cfc60181ef455bcf0.docx]

**Supplementary Materials (SM)**

SM 1. Equations of the market model

SM 2. Calibration of the market model

SM 3. Quality effect on conventional F&V; economic, biodiversity and health indicators

SM 4. Simulation model (excel file)

SM 5. Sensitivity analysis (excel file)

**SM 1. Equations of the market model**

The demand functions for the two types of F&V are derived from the maximization of a separable utility function, where is the consumer price of conventional F&V, is the quality indicator of conventional F&V (the quality indicator of organic F&V is assumed to be constant and is therefore incorporated into the constant term of the parametric form of the indirect utility function), is the consumer price of organic F&V, stands for total F&V expenditures, stands for consumption subsidies for conventional F&V, and stands for consumption subsidies for organic F&V. The two consumption subsidies are modeled as unit subsidies, applied to consumer prices; () is negative when the consumption of product is actually subsidized and is positive when it is actually taxed. Assuming that the indirect utility function defined from the utility function is quadratic, the resulting empirical demand functions for conventional and organic F&V take the following form, respectively:

(1)

(2)

where is the consumption of conventional F&V, is the consumption of organic F&V, and , , , , , , , and are behavior parameters to be calibrated (see SM 3)[[1]](#footnote-1).

On the supply side, the first-stage maximization program defines two restricted profit functions, for conventional F&V and for organic F&V, where is the producer price of conventional F&V, is the unit aid linked to the producer price of conventional F&V ( can be positive or negative), is the price of mineral fertilizers, is the ad valorem tax on the price of mineral fertilizers ( can be negative or positive), is the price of synthetic pesticides, is the ad valorem tax on the price of synthetic pesticides ( can be negative or positive), is the unit cost of other raw materials used in the conventional production sector, is the land area dedicated to conventional F&V production, are other fixed factors for conventional F&V, is the decoupled aid per hectare of conventional F&V, is the producer price of organic F&V, is the unit aid linked to the producer price of organic F&V ( can be positive or negative), is the unit cost of raw materials used in the organic production sector, is the land area dedicated to organic F&V production, are other fixed factors for organic F&V, and is the decoupled aid per hectare of organic F&V.

The two restricted profit functions and are modeled as normalized quadratic profit functions; is normalized by and is normalized by ; both and are normalized to one; and are included in constant terms. Subject to these assumptions, the two restricted supply functions can we written as:

(3)

where , , , , and are behavior parameters to be calibrated;

(4)

where , , and are behavior parameters to be calibrated[[2]](#footnote-2).

The second stage of the producer maximization program defines a joint restricted profit function , where is the fixed total area in F&V, by setting the marginal productivity of land equal across the two uses:

(5)

The derived land demand functions for the two uses are then obtained by solving the following system:

(6a)

(6b)

i.e.,

(7)

where , , , , , , and are behavior parameters to be calibrated.

The two land allocation functions can finally be written as:

(8)

(9)

Substituting equation (8) into equation (3) and equation (9) into equation (4) yields the final supply functions for conventional and organic F&V, respectively:

(10)

(11)

or, equivalently, by redefining the parameters with new more synthetic notations:

(12)

(13)

The derived demand functions for mineral fertilizers and synthetic pesticides used in the conventional F&V sector can be derived in a similar way.

Net import functions for conventional and organic F&V are defined as, respectively:

(14)

(15)

where, , , and are parameters to be calibrated.

Consumer prices are linked to producer prices through fixed marketing margins:

(16)

(17)

where is the marketing margin for conventional F&V, and is the marketing margin for organic F&V.

Each market segment is cleared by setting supply, including net imports, equal to demand, and model resolution is carried out in consumer prices by solving the following system:

(18a)

(18b)

i.e.,

(19a)

(19a)

The equilibrium consumer prices are obtained by applying Cramer's rule to the system of equations (19a) and (19b). The equilibrium values of the other endogenous variables are then derived using the respective equations that define them.

**SM 2. Calibration of the market model**

**2.1. Quantity, price and policy parameter data for the base year**

| **Variable** | **Value in 2020** | **Main data sources and/or computational procedures** |
| --- | --- | --- |
| Market variables for all F&V (sum of conventional and organic F&V) | | |
| ST | 7,800,000 t | Levet (2021). [Levet A.M, 2021. Diagramme de la distribution 2020, les flux de la filière fruits et légumes frais. INFOS CTIFL, n°377, 6 p. (in French)].  5.6 Mt sold as fresh F&V and 2.2 Mt sold à processed F&V. |
| NMT | 4,103,428 t | From Levet (2021).  Net imports of fresh F&V are known (3.2 Mt). Net imports of processed F&V are not known. We assumed that the share of net imports of processed F&V in domestic production sold as processed F&V was equal to the share of net imports of F&V in domestic production. Hence: NMT = 3.2 + (3.2/7.8) x 2.2 = 4.1 Mt. |
| DT | 11,903,428 t | = ST + NMT. |
| pt | 844 €/t | From Levet (2021).  The producer price of fresh F&V was calculated by dividing the value of fresh F&V production by its volume. The producer price of processed F&V was calculated by dividing the value of processed F&V production by its volume. The producer price was calculated as the weighted average of these two prices. |
| pdt | 2,663 €/t | From Levet (2021).  The consumer price of fresh F&V is known. We assumed that the consumer price of processed F&V expressed in fresh F&V equivalent was equal to the consumer price of fresh F&V. |
| MMT | 1819 €/t | = pd – p. |
| Market variables for the organic segment | | |
| SO | 642,186 t | “Agence Bio” website (<https://www.agencebio.org/>). |
| NMO | 320,524 t | From the “Agence Bio” website (<https://www.agencebio.org>).  Net imports of fresh organic F&V were calculated as the difference between gross imports minus gross exports (246,215 t). We assumed that the production share of organic F&V that were processed was equal to the production share of all F&V that were processed (2.2/7.8 = 0.282). The volume of organic F&V production that was processed is thus equal to: 0.282 x 642,186 = 181,129 t. Net imports of organic F&V in a processed form were then calculated using the same rule as that applied to all F&V. Overall, net imports of organic F&V (imported in fresh and processed form) are equal to: 246,215 + (3.2/7.8) x 181,219 = 320,524 t. |
| DO | 962,710 t | = SO + NMO. |
| po | 1,181 €/t | From the “Agence Bio” website (<https://www.agencebio.org>)  The consumer price of fresh organic F&V is known (1,452 €/t). We assumed that the producer price differential in percentage between organic F&V sold in processed form versus fresh form was equal to the differential calculated for all F&V (34%). Hence, po = 1.452 x (461.057/642.186) + 1.452 x 0.34 x (181,129/642,186) = 1,042 + 139 = 1,181 €/t. |
| MMO | 2,112 €/t | We assumed that the marketing margin on organic F&V was greater that the marketing margin on total F&V, specifically: NMO = NMT + 293 = 2,112 €/t. |
| pdo | 3,293 €/t | = po + NMO. |
| Market variables of the conventional segment | | |
| SC | 7,157,814 t | = ST – SO. |
| NMC | 3,782,904 t | = NMT – NMO. |
| DC | 10,940,718 t | = DT – DO. |
| pc | 844 €/t | We used the following identity: p = pc x (SC/ST) + pb x (SB/ST). Hence: pc = (p – pb x (SB/ST)] / (SC/ST) = 844 €/t. |
| pdc | 2,663 €/t | We used the following identity: pd = pcd x (DC/DT) + pbd x (DB/DT). Hence: pcd = [pd – pbd x (DB/DT)] / (DC/DT) = 2,664 €/t. |
| MMC | 1,819 €/t | = pdc – pc. |
| Other economic variables | | |
| LO | 77,613 ha | “Agence Bio” website (<https://www.agencebio.org/>).  = Areas certified for organic fruit production (39,668 ha) + Areas certified for organic vegetable production (37,945 ha). |
| yieldO | 8.27 t/ha | = SO/LO. |
| LC | 588,418 ha | From the “Agence Bio” website (<https://www.agencebio.org/>).  We selected this source to ensure consistency with the areas certified for organic farming (the different data sources are not perfectly consistent). The estimate includes F&V-growing areas in the process of conversion to OF but not yet certified (because they do not benefit from the price premium of organic F&V). |
| yieldC | 12,16 t/ha | = SO/LO. |
| L | 666,031 ha | = LC + LO. |
| XFC  XPC | 301,858.4 units  301,858.4 units | The Farm Accountancy Data Network (FADN) data makes it possible to calculate fertilizer and pesticide expenditures of non-organic farms for different technical and economic orientations, notably for the farming type 39 corresponding to fruit and other permanent crops. Based on this source and various other sources, including agricultural media, we estimated that fertilizer and pesticide expenditures accounted for 10% of revenues (5% for fertilizers and 5% for pesticides). The prices of both chemical inputs were normalized to 1,000. As a result, the quantities of fertilizers and pesticides used in the conventional sector were set at 301,858.434 units (u). |
| wf  wp | 1,000  1,000 | Price normalized to 1,000.  Price normalized to 1,000. |
| wc.XC/LC  wo.X0/LO | 3,286 €/ha  3,129 €/ha | From the “Observatoire de la formation des prix et des marges des produits alimentaires” (<https://observatoire-prixmarges.franceagrimer.fr/>).  The 2025 report from the Observatory to the French Parliament provides a rough breakdown of variable costs for fruit farms and for vegetable farms (see Figures 215 and 222 of the report). Specifically, “Variable costs” in 2020 were broken down a follows:  For all fruit farms; land rents, financial charges, taxes and levies, insurance (6%) + depreciation (10%) + other intermediate consumption (31%) + crop inputs (8%) + hired labor costs (22%) + net operating surplus (23%),  For all vegetable farms; land rents, financial charges, taxes and levies, insurance (4%) + depreciation (10%) + other intermediate consumption (33%) + crop inputs (14%) + hired labor costs (21%) + net operating surplus (19%).  We therefore assumed that the distribution for all conventional and organic F&V farms was: land rents, financial charges, taxes and levies, insurance, depreciation (15%) + other intermediate consumption (32%) + crop inputs (11%) + hired labor costs (21%) + net operating surplus (21%).  As a result, we assumed that the costs of other intermediate inputs per ha of conventional F&V amounted to 3,286 €/ha (= 32% of conventional revenues), and that the costs of intermediate inputs par ha of organic F&V amounted to 3,847 €/ha (= 39% of organic revenues). The costs of other intermediate inputs in F do not include expenditures associated with mineral fertilizers and synthetic pesticides (that are explicitly modeled) while the costs of intermediate consumption in OF include expenditures on fertilizers and pesticides permitted in OF. |
| wc.XC  wo.XO | 1,933.5 M€  242.9 M€ | = (wc.XC/LC).LC.  = (wo.XO/LO).LO. |
| Policy parameters (even though the model was calibrated for the year 2020, the policy parameters reflect the current situation) | | |
| acc | 0 €/t | Coupled payment tied to the producer price of conventional F&V. |
| twf | 0% | Ad valorem tax on mineral fertilizers used in conventional F&V. |
| twp | 0% | Ad valorem tax on synthetic pesticides used in conventional F&V.  Assumption adopted in light of the implementation arrangements of the Diffuse Pollution Tax (RPD according to French acronym), which is essentially paid by pesticide distributors:  <https://www.legifrance.gouv.fr/codes/section_lc/LEGITEXT000006074220/LEGISCTA000006195230/2021-02-14> |
| adc | 267 €/ha | Income support aid per hectare of conventional F&V.  Before 2023, an agricultural holding (either conventional or organic) could receive: (i) the decoupled payment (€132 per ha on average); (ii) the greening payment (€84 per ha on average); (iii) the redistributive payment on the first 52 hectares (€51 per ha on average); (iv) the young farmer payment on the first 36 hectares (€70 per hectare on average); (v) coupled payments per hectare, provided the corresponding productions were eligible (for F&V, plums for processing, tomatoes for processing, processed fruit); and (v) different CAP (Common Agricultural Policy) Pillar 2 payments (e.g., less-favoured area aids, agri-environmental and climate measures, etc.). The average aid will be calibrated by summing payments (i), (ii), and (iii), that is: 267 €/ha. From 2023, the greening payment was abolished and replaced by the eco-scheme payment. Given the ease of access to the eco-scheme in France (Lassalas et *al.*, 2023), it can reasonably be assumed that adc is unchanged. |
| subdc | 0 €/t | Consumption subsidy tied to the consumer price of conventional F&V. |
| aco | 0 €/t | Coupled payment tied to the producer price of organic F&V. |
| ado | 300 €/t | Income support aid per hectare of organic F&V.  Before 2023, certified organic farms could benefit from specific payments, which were granted per hectare and varied depending on the production type (e.g., for F&V, €900/ha for F&V tree farming, €250/ha for open-field vegetable crops). However, the State gradually withdrew from this support, leaving it up to regional authorities and water basin agencies, resulting in significant disparities depending on regional choices. Given the very limited regional budgets, many regions were only able to provide modest funding for maintenance payments. After 2023, certified organic farms may receive a specific payment under the eco-scheme; this payment is €30 greater than the payment at the second level of the eco-scheme. Furthermore, organic farmers benefit from a tax credit of €3,500 per farm.  The income support aid per hectare of organic F&V was therefore calibrated using the following equation: ado = adc + 30 + 3,500 x (N0/L0) = 300 €/ha. |
| subdo | 0 €/t | Consumption subsidy tied to the consumer price of organic F&V. |

**SM 2.1 references**

Lassalas, M., Guyomard, H., Détang-Dessendre, C., Chatellier, V., & Dupraz, P. The implementation of the new Common Agricultural Policy in France will not be environmentally ambitious. Journal of Environmental Planning and Management, doi.org/10.1080/09640568.2024.2379310 (2024).

Levet, A. L. Diagramme de la distribution 2020 : Les flux de la filière fruits et légumes frais. *Infos CTIFL* 377, Décembre 2021, 15p. (2021) [In French].

**2.2. Behavioral parameters**

The available data does not allow for the econometric estimation of the parameters of the supply functions for the two types of F&V, the derived demand functions for the two chemical inputs, and the land allocation functions. A literature review does not provide sufficient basis either. This is because the few available studies typically focus on a specific fruit or vegetable or a few F&V, most often in a country or region other than France and with diverging estimates, and do not distinguish between conventional and organic products. As underlined by McFadden *et al.* (2021), “estimates of own- and cross-price elasticities of supply for organic FV do not currently exist”.

Consequently, we opted for an ad hoc calibration process for supply and derived demand parameters, based on a qualitative synthesis of parameter estimates available in the literature (Fadhuile *et al.*, 2016; Bareille and Gohin, 2020) — although these estimates did not precisely align with our analytical framework — and guided by the following principles: (i) the theoretical properties (symmetry, homogeneity, convexity or concavity in prices) of the indirect utility function and the two restricted profit functions (see SM 1) were imposed; (ii) the supply functions for the two types of F&V (see equations 3 and 4 in SM 1) and the derived demand functions for the two chemical inputs in conventional agriculture were assumed to be price inelastic; and the final demand functions for the two types of F&V (see equations 1 and 2 in SM 1) were assumed to be slightly more price elastic than supply functions.

**SM 2.2 references**

Bareille, F. & Gohin, A. Simulating the Market and Environmental Impacts of French Pesticide Policies: A Macroeconomic Assessment. *Annals of Economics and Statistics* 139, 1-28 (2020).

Fadhuile, A., Lemarié, S. & Pirotte, A. Disaggregating the demand for pesticides: Does it matter? *Canadian Journal of Agricultural Economics / Revue canadienne d’agroéconomie* 64(2), 223-252 (2016).

McFadden, B. R., Bovay, J. & Mullaly, C. What are the overall implications of rising demand for organic fruits and vegetables? Evidence from theory and simulations. *Q Open* 1, 1-24 (2021).

**SM 3. Quality effect of conventional F&V; economic, biodiversity and health indicators**

**3.1. Modeling the quality effect of conventional F&V in demand equations**

Consumer concern about pesticide residues in food products is well documented and constitutes a key driver of the higher willingness of consumers to pay for pesticide-free alternatives and specifically organic products (Bazoche *et al.*, 2014; Koch *et al.*, 2017; Katt and Meixner, 2020; Siegrist and Hartmann, 2020; Nitzko, 2024). This behavior has fostered the emergence of segmented food markets in which conventional and organic products are clearly price-differentiated. An important question, therefore, is to what extent consumer preferences and valuations of organic versus conventional products might change if conventional producers were to partially reduce their reliance on synthetic pesticides (e.g., by 10% or 20%). Would consumers attribute greater value to conventional products if these were perceived as safer, thereby narrowing the willingness-to-pay gap between organic and conventional products? Or would they remain indifferent, perceiving that the safety differential between the two categories has not been significantly/sufficiently reduced?

To the best of our knowledge, the effect of reducing synthetic pesticide use on consumers’ perceived quality of conventional products has not yet been examined in empirical research. Yet this effect is crucial to consider, as it may shape market equilibria following the implementation of policy instruments. In our model, we explicitly account for this ‘quality effect’ by specifying both conventional and organic F&V demands as functions of the quality of conventional products, i.e., as functions of the quality parameter that captures potential changes in consumer perceived quality of conventional.

Specifically, both demand functions incorporate the quality parameter as follows (see equations (1) and (2) in SM 1, which define notations):

(1)

(2)

The parameter is defined as follows:

(3)

where the superscript (respectively, ) refers to the situation in scenario (respectively, the initial situation), and and are quality parameters to be calibrated (others notations were defined in SM 1 and SM 2).

The parameter represents the perceived quality of conventional F&V in the initial situation. The parameters captures consumer sensitivity to reductions in the use of synthetic pesticides in CF.

To parameterize equations (3) as well as parameters and in equations (1) and (2) we assumed the following:

- The parameter was set to the consumer price of conventional F&V in the initial situation ().
- The parameter was calibrated so that the quality parameter in an hypothetical scenario with no synthetic pesticides () is equal to the constant quality parameter of organic F&V (
- The demand equation parameters and were calibrated so that corresponding quality elasticities in the initial situation were equal to 0.1 ( and -0.6 (), respectively.

All scenarios simulated and analyzed in the paper therefore assume that the demand for conventional F&V positively reacts to the improved quality of conventional F&V and that the demand for organic F&V negatively reacts to the improved quality of conventional F&V. This perceived quality of conventional F&V rises proportionally with the decrease in synthetic pesticides applied per kilogram of conventional F&V. The sensitivity analysis provided in SM 5 presents the results of the three scenarios targeting a 10% reduction in chemical input use, under the alternative assumption that the perceived quality of conventional F&V remains constant at its initial level.

**SM 3.1 references**

Bazoche, P., Combris, P., Giraud-Héraud, E., Seabra-Pinto, A. & Tsakiridou, E. Willingness to pay for pesticide reduction in the EU: Nothing but organic? *European Review of Agricultural Economic* 41, 87-109.

Katt, F., & Meixner, O. A systematic review of drivers influencing consumer willingness to pay for organic food. *Trends in Food Science & Technology* 100, 374-388 (2020).

Koch, S., Epp, A., Lohmann, M. & Böl, G. F. Pesticide residues in food: Attitudes, beliefs, and misconceptions among conventional and organic consumers. *Journal of Food Protection* 80(12), 2083-2089 (2017).

Nitzko, S. Consumer evaluation of food from pesticide-free agriculture in relation to conventional and organic products. *Farming Systems* 2(4), 100112 (2024).

Siegrist, M. & Hartmann, C. (2020). Consumer acceptance of novel food technologies.*Nature Food* 1(6), 343-350 (2020).

**3.2. Economic indicators**

Computing the changes in consumption expenditure for the two types of F&V is straightforward. Calculating the budgetary cost for each scenario is also straightforward. The computation of changes in value added for both conventional and organic F&V, and hence in social costs, requires additional assumptions.

The value-added function per hectare of conventional F&V in the initial situation () and the value-added function per hectare of organic F&V in the initial situation (were defined as follows (other notations were detailed in SM 1):

(1)

(2)

These two value-added functions in scenario were defined as follows:

(3)

(4)

Equation (4) shows that the cost of intermediate consumption per hectare of organic F&V was assumed to be constant. This assumption was made due to the inability to assess how this cost would respond to changes in policy parameters. In equation (3), expenditures on mineral fertilizers and synthetic pesticides per hectare of conventional F&V are endogenous. Nevertheless, the unit prices of the two chemical inputs ( and ) are assumed to be constant, even though it is possible — or even likely — that they would respond to changes in the total quantities of mineral fertilizers and synthetic pesticides. This simplifying assumption was made due to a lack of information on supply elasticities of the two chemical inputs. Equation (3) captures the fact that fertilization and plant protection expenditures for conventional F&V by means other than mineral fertilizers and synthetic pesticides increase when the quantities of the two chemical inputs decrease. Finally, as with organic F&V and for the same reason, we assumed that the cost of other intermediate consumption per hectare of conventional F&V was constant.

The change in social welfare in scenario s relative to the initial situation ( was calculated as the sum of (i) the change in consumer surplus (measured for both types of F&V) and ii) the change in producer surplus (measured as the sum of value added in organic and conventional F&V production), minus (iii) the budgetary cost of the scenario.

**3.3. Biodiversity indicator**

Fig. 3.1 illustrates the reduction in biodiversity impact resulting from lower use of chemical inputs per hectare in CF, depending on whether the relationship between chemical inputs and biodiversity is concave (assuming ), linear (assuming ), or convex (assuming

**
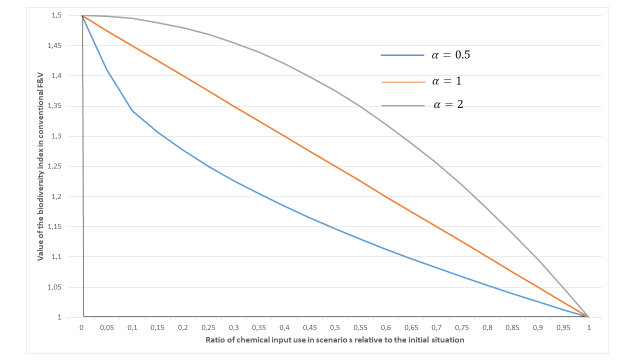
**

**Fig. 3.1 |** Relationship between biodiversity per hectare of conventional F&V (vertical axis) and the use of chemical inputs per hectare in CF (horizontal axis), depending on whether the chemical input - biodiversity function is concave linear (, or convex (

**3.4. Health indicator**

F&V are considered essential components of a healthy diet and are therefore recommended by the World Health Organization and numerous national public health agencies worldwide. Several systematic reviews and meta-analyses have demonstrated that higher F&V consumption is associated with a reduced risk of type 2 diabetes, cardiovascular diseases, and certain cancers. For example, Wang *et al.* (2021) reported inverse associations between F&V intake and both total mortality and cause-specific mortality, including cancer, cardiovascular disease, and respiratory disease. Compared with a reference level of 2 servings of F&V per day, a daily intake of 5 servings of F&V was associated with relative risks (RR) of 0.87 for total mortality, 0.88 for cardiovascular disease mortality, 0.90 for cancer mortality, and 0.65 for respiratory disease mortality.

grown produce (Kesse-Guyot *et al., 2023*); and (iii) pesticide exposure has been linked to an increased risk of various pathologies, including non-Hodgkin’s lymphoma, multiple myeloma, prostate cancer, Parkinson’s disease, as well as cognitive and respiratory disorders (Vigar *et al.*, 2020).

Although, to date, pesticide residues in the majority of commercially available F&V remain below regulatory limits (European Similarly, Aune *et al.* (2017) estimated that, for combined F&Vs, the RR for 200 grams of F&V per day was 0.92 for coronary heart disease, 0.84 for stroke, 0.92 for cardiovascular disease, 0.97 for total cancer, and 0.90 for all-cause mortality. Bechthold *et al.* (2017) also reported an inverse correlation between F&V consumption and coronary heart disease, with RR of 0.94 and 0.97 per 100 g/day of fruits and vegetables, respectively.

However, these studies did not examine the associations between F&V consumption and total or cause-specific mortality with respect to production methods. It is well established that (i) conventional F&V production generally relies on the use of large quantities of pesticides (Galimberti *et al.*, 2020; Oger, 2022); (ii) a primary route of pesticide exposure in the population is through diets, particularly via consumption of conventionally Food Safety Agency, 2025), recent studies have reported significantly higher exposure levels to certain pesticides among high consumers of F&V (Kesse-Guyot *et al.*, 2023). Using data from three large US prospective cohorts, Sandoval-Insausti *et al.* (2022) examined the association between F&V intake, according to pesticide residue status, and mortality. They found an inverse association with intake of low-pesticide-residue F&V: consuming greater than 4 servings/day was associated with a 36% lower risk of total mortality compared with consuming less than 1 serving/day. Conversely, intake of high-pesticide-residue F&V was unrelated to mortality. In an American cohort, Côté *et al.* (2022) reported a positive association between intake of high-pesticide-residue F&Vs and glioma. Rebouillat *et al.* (2022) found that higher pesticide exposure was associated with an increased risk of type 2 diabetes in a French cohort, while Rebouillat *et al.* (2021) reported that low exposure to synthetic pesticides was negatively associated with breast cancer risk in a cohort of French women.

Overall, significant positive outcomes have been observed in longitudinal studies, where increased organic intake was associated with a reduced incidence of infertility, birth defects, allergic sensitization, metabolic syndrome, high body-mass index, and non-Hodgkin lymphoma. In their systematic review, Vigar *et al.* (2020) noted that the current evidence base did not allow for a definitive statement on the health benefits of organic dietary intake, but concluded that an increasing number of important findings were being reported from observational research linking demonstrable health benefits with organic food consumption. Similarly, in a systematic review addressing the health impacts of organic versus conventional F&V intake, Baudry *et al.* (2023) concluded that, although further research was needed to more thoroughly investigate the relationship between low-dose chronic dietary pesticide exposure and non-communicable disease outcomes, existing studies suggested a potential role of dietary pesticide exposure in health effects. However, due to the limited number of epidemiological studies, significant uncertainties remain regarding the relative risk (RR) of all-cause or cause-specific mortality associated with the consumption of organic (low-pesticide) versus conventional (high-pesticide) F&V.

In summary, it is to assess policies aimed at reducing pesticide use by considering two potential health impacts:

- A nutritional impact, which relates to the quantity of F&V consumed, regardless of whether they are produced using conventional or organic methods. The greater the quantity of F&V consumed, the more favorable the outcome for public health.
- A quality impact, which concerns the presence of pesticide residues in conventionally produced F&V and may influence the RR risk associated with consuming conventional versus organic products. This effect must be considered, particularly if policy implementation leads to a reduction in pesticide use in conventional agriculture. In such a case, the lower the level of pesticide use in conventional production, the lower the associated RR, and the more favorable the outcome for public health.

To account for these two health effects, the health assessment of policy instruments and scenarios is based on the computation of the following health indicator *HI*:

(1)

where is the health indicator in scenario (and the baseline situation where ), is the quantity of conventionally produced F&V consumed in scenario , is the quantity of organically produced F&V consumed in scenario , is the relative risk associated with organic F&V consumption in scenario , and is the relative risk associated with conventional F&V consumption in scenario .

Given the uncertainties highlighted above, two cases were considered:

- Case 1. No difference exists between the RR of organic and conventional F&Vs. In this first case, we set a constant relative risk for all-cause mortality of 0.9 for both, meaning that each additional portion of F&V reduces the likelihood of premature mortality by 10%, regardless of the production method.
- Case 2. Organic (low-pesticide) F&V have a greater preventive effect on all-cause mortality than high-pesticide F&V. In this second case, we assume a constant relative risk of 0.8 for organic F&V (, a relative risk of 0.9 for conventional F&V in the initial situation (, and a relative risk for conventional F&V in scenario that decreases proportionally with the reduction in pesticide use induced by policy implementation according to the following equation:

(2)

where is the amount of synthetic pesticides used per kilogram of conventional F&V in scenario , and is the amount of synthetic pesticides used per kilogram of conventional F&V in the initial situation.

Equation (2) implies that, in a scenario where pesticide use in conventional agriculture is completely eliminated,

SM 5 provides a sensitivity analysis of simulation results with respect to the relative risk parameters for organic and conventional F&V.

**SM 3.4 references**

Aune, D., Giovannucci, E., Boffetta, P., Fadnes, L. T., Keum, N., Norat, T., Greenwood, D. C., Riboli, E., Vatten, L. J. & Tonstad, S. (2017). Fruit and vegetable intake and the risk of cardiovascular disease, total cancer and all-cause mortality — a systematic review and dose-response meta-analysis of prospective studies. *International Journal of Epidemiology* 46(3), 1029-1056 (2017).

Baudry, J., Rebouillat, P., Samieri, C., Berlivet, J. & Kesse-Guyot, E. Dietary pesticide exposure and non-communicable diseases and mortality: A systematic review of prospective studies among adults. Environmental Health 22(1), 76 (2023).

Bechthold, A., Boeing, H., Schwedhelm, C., Hoffmann, G., Knüppel, S., Iqbal, K., De Henauw, S., Michels, N., Devleesschauwer, B., Schlesinger, S., & Schwingshackl, L. Food groups and risk of coronary heart disease, stroke and heart failure: A systematic review and dose-response meta-analysis of prospective studies. *Critical Reviews in Food Science and Nutrition* 59(7), 1071-1090 (2019).

Côté, D. J., Bever, A. M., Chiu, Y. H., Sandoval-Insausti, H., Smith-Warner, S.A., Chavarro J. E. & Stampfer, M. J. Pesticide residue intake from fruit and vegetable consumption and risk of glioma. *American Journal of Epidemiology* 191(5), 825-833 (2022).

European Food Safety Authority) (EFSA). National summary reports on pesticide residue analyses performed in 2023. EFSA supporting publication 22(5), 243p., doi:10.2903/sp.efsa.2025.EN-9320 (2025).

Kesse-Guyot, E., Allès, B., Brunin, J., Langevin, B., Fouillet, H., Dussiot, A., Mariotti, F., Langevin, B., Berthy, F., Touvier, M., Julia, C., Hercberg, S., Lairon, D., Barbier, C., Couturier, C., Pointereau, P. & Baudry, J. Environmental pressures and pesticide exposure associated with an increase in the share of plant-based foods in the diet. *Scientific Reports* 13(1), 19317 (2023).

Rebouillat, P., Vidal, R., Cravedi, J. P., Taupier-Letage, B., Debrauwer, L., Gamet-Payrastre, L., Touvier, M., Hercberg, S., Lairon, D., Baudry, J. & Kesse-Guyot, E. Estimated dietary pesticide exposure from plant-based foods using NMF-derived profiles in a large sample of French adults. *European Journal of Nutrition* 60(3), 1475-1488 (2021).

Rebouillat, P., Vidal, R., Cravedi, J. P., Taupier-Letage, B., Debrauwer, L., Gamet-Payrastre, L., Guillou, H., Touvier, M., Fezeu, L. K., Hercberg, S., Laron, D., Baudry, J. & Kesse-Guyot, E. Prospective association between dietary pesticide exposure profiles and postmenopausal breast-cancer risk in the NutriNet-Santé cohort. *International Journal of Epidemiology* 50(4), 1184-1198 (2021).

Rebouillat, P., Vidal, R., Cravedi, J. P., Taupier-Letage, B., Debrauwer, L., Gamet-Payrastre, L., Guillou, H., Touvier, M., Fezeu, L. K., Hercberg, S., Lairon, D., Baudry, J.  & Kesse-Guyot, E. Prospective association between dietary pesticide exposure profiles and type 2 diabetes risk in the NutriNet-Santé cohort. *Environmental Health* 21(1), 57 (2022).

Sandoval-Insausti H., Chiu, Y. H., Wang, Y.X., Hart, J.E., Bhupathiraju, S. N., Mínguez-Alarcón, L., Ding, M., Willett, W. C., Laden, F. & Chavarro, J. E.. Intake of fruits and vegetables according to pesticide residue status in relation to all-cause and disease-specific mortality: Results from three prospective cohort studies. *Environment International* 159, 107024 (2022).

Vigar, V., Myers, S., Oliver, C., Arellano, J., Robinson, S. & Leifert, C. A Systematic Review of Organic Versus Conventional Food Consumption: Is There a Measurable Benefit on Human Health? *Nutrients* 12(1), 7 (2020).

Wang, D. D., Li, Y., Bhupathiraju, S. N., Rosner, B. A., Sun, Q., Giovannucci, E. L., Rimm, E. B., Manson, J., Willett, W. C., Stampfer, M. J. & Hu, F. B. (2021). Fruit and Vegetable Intake and Mortality: Results From 2 Prospective Cohort Studies of US Men and Women and a Meta-Analysis of 26 Cohort Studies. *Circulation* 143(17), 1642-1654 (2021).

**SM 4. Simulation model**

See: <https://doi.org/10.5281/zenodo.17398160>

**SM 5. Sensitivity analysis**

See: <https://doi.org/10.5281/zenodo.17398160>

1. In a general way, and. [↑](#footnote-ref-1)
2. In a general way, and [↑](#footnote-ref-2)
